# Supplementary material for: First-principles studies of enhanced oxygen reduction reactions on graphene- and nitrogen-doped graphene-coated platinum surfaces
Source: Royal Society of Chemistry journal article supplement (doi:10.1039/d4cp00269e), 2024-01-01
Supplement: d4cp00269e1.pdf [file d4cp00269e1.pdf]

## Supplementary Information

# First-principles studies of enhanced oxygen reduction reactions on graphene- and nitrogen-doped graphene-coated platinum surfaces

Ho Ngoc Nam,<sup>\*a,b</sup> Quan Manh Phung,<sup>c,d</sup> Pongpol Choeichom,<sup>a</sup>

Yusuke Yamauchi,<sup>b,e,f</sup> Nagahiro Saito<sup>\*a,g</sup>

<sup>a</sup>*Institute of Materials Innovation, Institutes of Innovation for Future Society, Nagoya University, Furo-cho, Chikusa-ku, Nagoya 464-8601, Japan*

<sup>b</sup>*Department of Materials Process Engineering, Graduate School of Engineering, Nagoya University, Nagoya 464-8603, Japan*

<sup>c</sup>*Department of Chemistry, Graduate School of Science, Nagoya University, Furo-cho, Chikusa-ku, Nagoya 464-8602, Japan*

<sup>d</sup>*Institute of Transformative Bio-Molecules (WPI-ITbM), Nagoya University, Furo-cho, Chikusa-ku, Nagoya 464-8601, Japan*

<sup>e</sup>*Australian Institute for Bioengineering and Nanotechnology (AIBN), The University of Queensland, Brisbane, QLD 4072, Australia*

<sup>f</sup>*Department of Chemical and Biomolecular Engineering, Yonsei University, Seoul 03722, South Korea*

<sup>g</sup>*Department of Chemical Systems Engineering, Graduate School of Engineering, Nagoya University, Nagoya, 464-8603, Japan*

\*Email: [honam@sp.material.nagoya-u.ac.jp](mailto:honam@sp.material.nagoya-u.ac.jp) (HNN); [hiro@sp.material.osaka-u.ac.jp](mailto:hiro@sp.material.osaka-u.ac.jp) (NS)

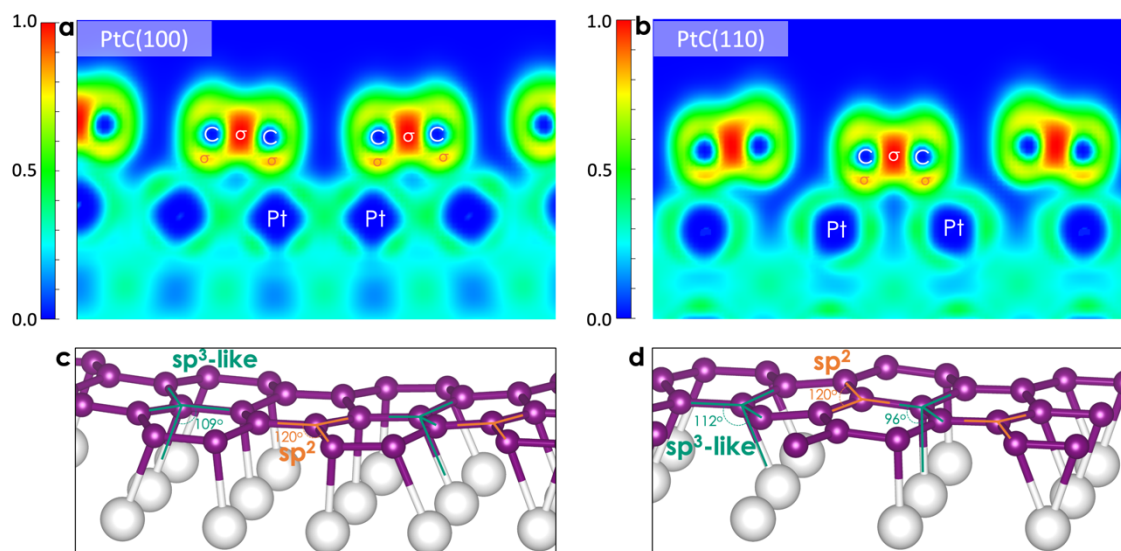

**Figure S1:** The calculated electron localization function (ELF) between Pt and C atoms of (a) Pt(100)@C and (b) Pt(110)@C systems (where blue regions represent no bonding feature while red regions represent electron pairing with covalent bond feature). The covalent bonds between nearest atoms are denoted by  $\sigma$ . Accordingly, the strong localized electrons observed between C-C atoms as evidence of covalent bonds. Similarly, there are pretty high localized electron regions observed between Pt-C atoms, which indicates some character of the covalent bond between Pt-C even though its strength is weaker as compared to C-C bonds.

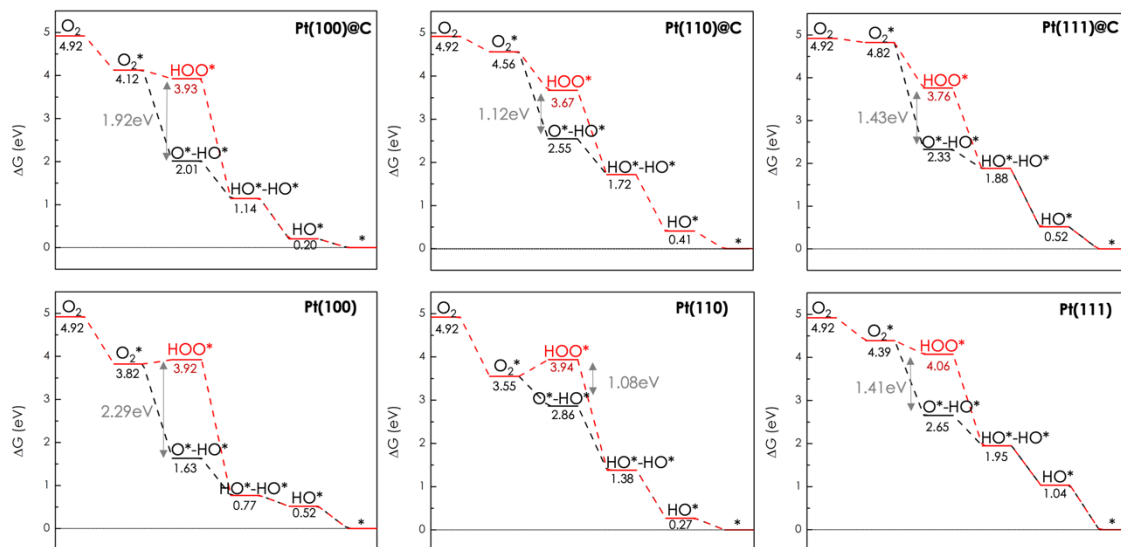

**Fig. S2:** Free energy diagram at  $U_{\text{RHE}} = 0$  V of ORR on Pt(100), Pt(110), Pt(111), and corresponding graphene-coated surfaces, involving  $\text{*O-}^*\text{OH}$  (in black) or  $\text{*OOH}$  (in red).

In Figure S2, we show the free energy diagram at  $U_{\text{RHE}} = 0$  V of ORR on Pt(100), Pt(110), Pt(111), and respective graphene-coated surfaces. A consistent observation is the systematic instability of the  $\text{*OOH}$  intermediate compared to  $\text{*O-}^*\text{OH}$  by a minimum of 1.0 eV. Let us assume that all mechanisms involve only  $\text{*OOH}$ . The oxygen reduction reaction (ORR) on Pt(100) and Pt(110) would be highly inefficient due to the endergonic nature of the first hydrogenation reaction to  $\text{*OOH}$ . On Pt(111) surface, the first hydrogenation step is predicted to be the rate-determining step (RDS). At an electrode potential of 1.23 V, the activation free energy of this step is 0.90 eV.

On Pt(100)@C and Pt(110)@C, the reaction is downhill at zero electrode potential. This indicates that these graphene-coated surfaces should be significantly more

reactive than the corresponding bare Pt surfaces. On Pt(100)@C, the first hydrogenation ( $^*O_2$  to  $^*OOH$ ) and the last hydrogenation ( $^*OH$  to  $H_2O$ ) steps have near identical activation free energies (1.03 eV). They are both considered the RDS. The Pt(110)@C surface has an activation free energy of 0.82 eV for the last hydrogenation step. On the Pt(111)@C surface, the last hydrogenation step is the RDS, with an activation free energy of 0.71 eV. Again, in comparison to the Pt(111) surface, Pt(111)@C is marginally more reactive.

In summary, assuming the  $^*OOH$  intermediate and considering the RDS activation free energy, the catalytic activity is ranked as Pt(111)@C > Pt(110)@C  $\approx$  Pt(111)  $\approx$  Pt(100)@C  $\gg$  Pt(100) > Pt(110).

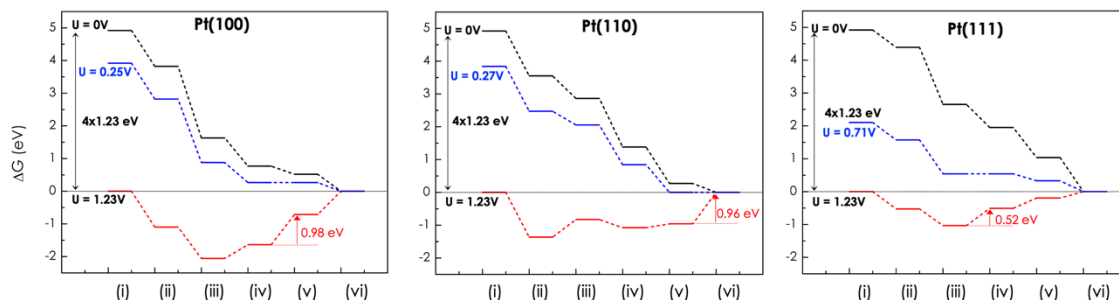

**Fig. S3:** Free energy diagram of ORR on Pt(100), Pt(110), and Pt(111) at different electrode potentials:  $U_{RHE} = 0$  V (black line),  $U_{RHE} = 1.23$  V (red line), and limiting potential  $U_L$ .  $^*O$ - $^*OH$  is the intermediate.

In Figure S3, we show the free energy diagram of ORR on Pt(100), Pt(110), and Pt(111) at different electrode potentials:  $U_{RHE} = 0$  V, 1.23 V, and  $U_L$ . Here,  $^*O$ - $^*OH$  is the intermediate. Comparing Figure S3 and Figure 6(b) enables a clear distinction between the bare Pt surfaces and Pt@C surfaces.

**Table S1:** The calculated data of electronic energy ( $E_{elec}$ ), zero-point energy correction ( $E_{ZPE}$ ), vibrational heat capacity ( $C_p$ ), and adsorbate entropy ( $S$ ) at  $T = 298.15$  K from DFT method is collected for all considered systems, including Pt(100), Pt(110), Pt(111), Pt(100)@C, Pt(110)@C, Pt(111)@C, Pt(111)@C/N, and isolated gas. The substrate is denoted as \*, where species are adsorbed.

| Pt(100)          |                 |                |            |           |              |
|------------------|-----------------|----------------|------------|-----------|--------------|
| Intermediates    | $E_{elec}$ (eV) | $E_{ZPE}$ (eV) | $C_p$ (eV) | $TS$ (eV) | $G$ (eV)     |
| *                | -508386.3516    |                |            |           | -508386.3516 |
| O <sub>2</sub> * | -509517.3709    | 0.139          | 0.069      | 0.156     | -509517.3189 |
| HOO*             | -509533.4633    | 0.407          | 0.061      | 0.121     | -509533.1163 |
| O*-HO*           | -509535.7969    | 0.427          | 0.064      | 0.103     | -509535.4089 |
| HO*-HO*          | -509552.8716    | 0.758          | 0.080      | 0.135     | -509552.1686 |
| HO*              | -508969.4489    | 0.358          | 0.045      | 0.081     | -508969.1270 |
| Pt(110)          |                 |                |            |           |              |
| Intermediates    | $E_{elec}$ (eV) | $E_{ZPE}$ (eV) | $C_p$ (eV) | $TS$ (eV) | $G$ (eV)     |
| *                | -508376.7283    |                |            |           | -508376.7283 |
| O <sub>2</sub> * | -509508.0503    | 0.133          | 0.049      | 0.097     | -509507.9653 |
| HOO*             | -509523.8521    | 0.420          | 0.054      | 0.102     | -509523.4801 |
| O*-HO*           | -509524.8314    | 0.380          | 0.069      | 0.171     | -509524.5534 |
| HO*-HO*          | -509542.5405    | 0.673          | 0.069      | 0.133     | -509541.9315 |
| HO*              | -508960.0638    | 0.353          | 0.048      | 0.088     | -508959.7508 |
| Pt(111)          |                 |                |            |           |              |
| Intermediates    | $E_{elec}$ (eV) | $E_{ZPE}$ (eV) | $C_p$ (eV) | $TS$ (eV) | $G$ (eV)     |
| *                | -457553.4876    |                |            |           | -457553.4876 |
| O <sub>2</sub> * | -458683.9862    | 0.148          | 0.063      | 0.111     | -458683.8862 |
| HOO*             | -458700.4599    | 0.415          | 0.074      | 0.143     | -458700.1139 |
| O*-HO*           | -458701.8402    | 0.402          | 0.092      | 0.174     | -458701.5202 |
| HO*-HO*          | -458718.7104    | 0.693          | 0.108      | 0.213     | -458718.1224 |
| HO*              | -458136.0043    | 0.316          | 0.050      | 0.107     | -458135.7453 |
| Pt(100)@C        |                 |                |            |           |              |
| Intermediates    | $E_{elec}$ (eV) | $E_{ZPE}$ (eV) | $C_p$ (eV) | $TS$ (eV) | $G$ (eV)     |
| *                | -514404.2707    |                |            |           | -514404.2707 |
| O <sub>2</sub> * | -515535.0904    | 0.184          | 0.047      | 0.076     | -515534.9354 |
| HOO*             | -515551.4077    | 0.458          | 0.083      | 0.166     | -515551.0327 |

|                      |                 |                |            |           |              |
|----------------------|-----------------|----------------|------------|-----------|--------------|
| O*-HO*               | -515553.3823    | 0.464          | 0.049      | 0.076     | -515552.9453 |
| HO*-HO*              | -515570.4868    | 0.809          | 0.063      | 0.097     | -515569.7118 |
| HO*                  | -514987.7247    | 0.391          | 0.041      | 0.067     | -514987.3597 |
| Pt(110)@C            |                 |                |            |           |              |
| Intermediates        | $E_{elec}$ (eV) | $E_{ZPE}$ (eV) | $C_p$ (eV) | $TS$ (eV) | $G$ (eV)     |
| *                    | -516404.5780    |                |            |           | -516404.5780 |
| O <sub>2</sub> *     | -517534.9622    | 0.186          | 0.047      | 0.076     | -517534.8052 |
| HOO*                 | -517552.0013    | 0.451          | 0.062      | 0.107     | -517551.5953 |
| O*-HO*               | -517553.1459    | 0.456          | 0.05       | 0.078     | -517552.7179 |
| HO*-HO*              | -517570.1855    | 0.789          | 0.076      | 0.126     | -517569.4465 |
| HO*                  | -516987.8275    | 0.389          | 0.043      | 0.069     | -516987.4645 |
| Pt(111)@C            |                 |                |            |           |              |
| Intermediates        | $E_{elec}$ (eV) | $E_{ZPE}$ (eV) | $C_p$ (eV) | $TS$ (eV) | $G$ (eV)     |
| *                    | -462064.4389    |                |            |           | -462064.4389 |
| O <sub>2</sub> *     | -463194.5585    | 0.181          | 0.048      | 0.077     | -463194.4065 |
| HOO*                 | -463211.7332    | 0.461          | 0.082      | 0.174     | -463211.3642 |
| O*-HO*               | -463213.2392    | 0.468          | 0.050      | 0.078     | -463212.7992 |
| HO*-HO*              | -463229.8776    | 0.789          | 0.076      | 0.129     | -463229.1416 |
| HO*                  | -462647.5811    | 0.394          | 0.041      | 0.066     | -462647.2121 |
| Pt(111)@C/N          |                 |                |            |           |              |
| Intermediates        | $E_{elec}$ (eV) | $E_{ZPE}$ (eV) | $C_p$ (eV) | $TS$ (eV) | $G$ (eV)     |
| *                    | -462196.4021    |                |            |           | -462196.4021 |
| O <sub>2</sub> *     | -463326.5289    | 0.146          | 0.070      | 0.144     | -463326.4569 |
| HOO*                 | -463343.8115    | 0.466          | 0.079      | 0.147     | -463343.4135 |
| O*                   | -462762.4885    | 0.092          | 0.027      | 0.044     | -462762.4135 |
| HO*                  | -462779.1639    | 0.386          | 0.044      | 0.073     | -462778.8069 |
| Isolated gas         |                 |                |            |           |              |
| Gas                  | $E_{elec}$ (eV) | $E_{ZPE}$ (eV) | $C_p$ (eV) | $TS$ (eV) | $G$ (eV)     |
| H <sub>2</sub>       | -31.749223      | 0.267          | 0.091      | 0.403     | -31.7952     |
| H <sub>2</sub> O (l) | -599.18683      | 0.564          | 0.104      | 0.670     | -599.1898    |
| O <sub>2</sub>       |                 |                |            |           | -1129.8692   |

The details procedure of applied potential on the Gibbs free energy difference could be approximated by:

$$\Delta G_U = \Delta G - neU$$

where  $n$  is the number of electrons transferred in each reaction step,  $e$  is the electron's elementary charge, and  $U$  is the applied electrode potential. Specifically, the applied potential to Gibbs free energy of reaction steps with the corresponding number of electrons transferred is as follows:

| Steps   | Intermediates                                                                              | Number of electrons transferred ( $n$ ) |
|---------|--------------------------------------------------------------------------------------------|-----------------------------------------|
| (i)     | $G_{\text{O}_2} + 2G_{\text{H}_2} - 2G_{\text{H}_2\text{O}} - neU$                         | 4                                       |
| (ii)    | $G^*_{\text{O}_2} + 2G_{\text{H}_2} - (2G_{\text{H}_2\text{O}} + G^*) - neU$               | 4                                       |
| (iii-a) | $G^*_{\text{O}\cdot\text{OH}} + 3/2G_{\text{H}_2} - (2G_{\text{H}_2\text{O}} + G^*) - neU$ | 3                                       |
| (iii-b) | $G^*_{\text{OOH}} + 3/2G_{\text{H}_2} - (2G_{\text{H}_2\text{O}} + G^*) - neU$             | 3                                       |
| (iv-a)  | $G^*_{\text{OH}\cdot\text{OH}} + G_{\text{H}_2} - (2G_{\text{H}_2\text{O}} + G^*) - neU$   | 2                                       |
| (iv-b)  | $G^*_{\text{O}} + G_{\text{H}_2} - (G_{\text{H}_2\text{O}} + G^*) - neU$                   | 2                                       |
| (v)     | $G^*_{\text{OH}} + 1/2G_{\text{H}_2} - (G_{\text{H}_2\text{O}} + G^*) - neU$               | 1                                       |
| (vi)    | $G_{\text{H}_2\text{O}} + G^* - (G_{\text{H}_2\text{O}} + G^*) - neU$                      | 0                                       |
